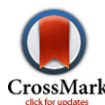

# SPI-23 of *S. Derby*: Role in Adherence and Invasion of Porcine Tissues

Matthew R. Hayward<sup>1,2,3\*</sup>, Manal AbuOun<sup>2</sup>, Roberto M. La Ragione<sup>1,4</sup>, Monika A. Tchorzewska<sup>5</sup>, William A. Cooley<sup>6</sup>, David J. Everest<sup>6</sup>, Liljana Petrovska<sup>2</sup>, Vincent A. A. Jansen<sup>3</sup>, Martin J. Woodward<sup>7</sup>

**1** Department of Structural and Computational Biology, European Molecular Biology Laboratory, Heidelberg, Germany, **2** Department of Bacteriology, Animal Health and Veterinary Laboratories Agency, Surrey, United Kingdom, **3** School of Biological Sciences, Royal Holloway University of London, Surrey, United Kingdom, **4** School of Veterinary Medicine, Faculty of Health and Medical Sciences, University of Surrey, Surrey, United Kingdom, **5** School of Veterinary Sciences, University of Bristol, Bristol, United Kingdom, **6** Microscopy Facility, Animal Health and Veterinary Laboratories Agency, Surrey, United Kingdom, **7** Department of Food and Nutritional Sciences, University of Reading, Reading, United Kingdom

## Abstract

*Salmonella enterica* serovars Derby and Mbandaka are isolated from different groups of livestock species in the UK. *S. Derby* is predominantly isolated from pigs and turkeys and *S. Mbandaka* is predominantly isolated from cattle and chickens. Alignment of the genome sequences of two isolates of each serovar led to the discovery of a new putative *Salmonella* pathogenicity island, SPI-23, in the chromosome sequence of *S. Derby* isolates. SPI-23 is 37 kb in length and contains 42 ORFs, ten of which are putative type III effector proteins. In this study we use porcine jejunum derived cell line IPEC-J2 and *in vitro* organ culture of porcine jejunum and colon, to characterise the association and invasion rates of *S. Derby* and *S. Mbandaka*, and tissue tropism of *S. Derby* respectively. We show that *S. Derby* invades and associates to an IPEC-J2 monolayer in significantly greater numbers than *S. Mbandaka*, and that *S. Derby* preferentially attaches to porcine jejunum over colon explants. We also show that nine genes across SPI-23 are up-regulated to a greater degree in the jejunum compared to the colon explants. Furthermore, we constructed a mutant of the highly up-regulated, *pilV*-like gene, *potR*, and find that it produces an excess of surface pili compared to the parent strain which form a strong agglutinating phenotype interfering with association and invasion of IPEC-J2 monolayers. We suggest that *potR* may play a role in tissue tropism.

**Citation:** Hayward MR, AbuOun M, La Ragione RM, Tchorzewska MA, Cooley WA, et al. (2014) SPI-23 of *S. Derby*: Role in Adherence and Invasion of Porcine Tissues. PLoS ONE 9(9): e107857. doi:10.1371/journal.pone.0107857

**Editor:** Cheryl A. Nickerson, The Biodesign Institute, Arizona State University, United States of America

**Received:** April 30, 2014; **Accepted:** August 15, 2014; **Published:** September 19, 2014

**Copyright:** © 2014 Hayward et al. This is an open-access article distributed under the terms of the Creative Commons Attribution License, which permits unrestricted use, distribution, and reproduction in any medium, provided the original author and source are credited.

**Data Availability:** The authors confirm that all data underlying the findings are fully available without restriction. All relevant data are within the paper and its Supporting Information files.

**Funding:** Engineering and Physical Sciences Research Council (EPSRC) www.epsrc.ac.uk 4 year studentship awarded to MRH. Animal Health and Veterinary Laboratories Agency (AHVLA) http://www.defra.gov.uk/ahvla-en/ seedcorn internal investment fund to MRH. Biotechnology and Biological Sciences Research Council (BBSRC) partners of the ERASysBio+ initiative supported under the EU ERA-NET Plus scheme in FP7 www.bbsrc.ac.uk BB/I004548/1 to VAAJ. The funders had no role in study design, data collection and analysis, decision to publish, or preparation of the manuscript.

**Competing Interests:** The authors have declared that no competing interests exist.

\* Email: hayward@embl.de

## Introduction

*Salmonella enterica* is an important zoonotic pathogen of warm blooded vertebrates, including humans and livestock. The symptoms of Salmonellosis include chronic gastroenteritis, affecting a wide range of host species and caused primarily by broad host range serovars, and an often fatal typhoid fever affecting a narrow range of host species, caused primarily by host limited or restricted serovars [1–3]. International serotyping has provided statistics that have elucidated links between certain serovars and a defined host species range [4–7].

In previous work the chromosome sequences of *S. enterica* serovars, Derby and Mbandaka were compared [8]. Isolation statistics suggest that these serovars have different host species biases in the UK: *S. Derby* is prominently isolated from pigs (40%) and turkeys (50%) and *S. Mbandaka* from chickens (65%) and cattle (20%) [5,8]. Alignment of the chromosome sequences led to the discovery of a new putative *Salmonella* pathogenicity island (SPI) in isolates of *S. Derby*, designated SPI-23 [8]. SPI-23 is 37 kb in length and encodes 42 genes, ten of which were identified by the

online tool SEIVE as putative type 3 effector proteins; of these eight were unique in nucleotide sequence to *S. Derby* [8,9]. Type III effector proteins are important pathogenicity factors secreted through the type III secretion system in to a host cell where they modulate cell signalling, in some instances pacifying the hosts immune system or aiding in invasion of, or translocation across, the intestinal epithelial barrier [10,11].

Considering the high number of putative pathogenicity genes on SPI-23 and the higher number of isolations of *S. Derby* from pigs in the UK it was posited that this island may play a role in pathogenicity in this host [8]. In the current study we undertake preliminary studies to start addressing this hypothesis; we show that *S. Derby* associates to, and invades, a porcine derived monolayer faster than *S. Mbandaka* and that SPI-23 is regulated in a tissue specific fashion. Furthermore a knock-out mutant of the most up-regulated gene, *potR*, results in cellular agglutination in a static culture. We discuss the possible role that *potR* and other SPI-23 genes may play in tissue tropism.

## Results and Discussion

### *S. Derby* associates and invades IPEC-J2 monolayers in significantly greater numbers than *S. Mbandaka* and shows a preference to associating with jejunum over colon explants

*S. Derby* is frequently isolated from pigs, while *S. Mbandaka* is rarely isolated from pigs in the UK [5–7]. To advance beyond the inferences made from comparative functional genomics regarding host adaptations we decided to see if *S. Derby* was more proficient in associating (adhering and invading) with, and invading, a porcine jejunum derived cell line (IPEC-J2) than *S. Mbandaka*. IPEC-J2 monolayers have been used previously as a model for the porcine jejunum, a site associated with the invasion of *Salmonella enterica* [12–14]. The rate of invasion and association was studied through varying lengths of incubation of *S. Derby* and *S. Mbandaka* isolates with IPEC-J2 monolayers.

From 15 minutes onwards there were significantly more *S. Derby* associated to the monolayer than there were *S. Mbandaka* ( $p < 0.05$ ), with the exception of *S. Derby* D1 and *S. Mbandaka* M2 at 15 minutes, which were not significantly different ( $p > 0.05$ ) (Figure 1). There was a significantly greater number ( $p < 0.05$ ) of *S. Derby* inside IPEC-J2 cells than *S. Mbandaka* at all-time points, with the exception of *S. Derby* D2 and *S. Mbandaka* M2 at 30 minutes, which were not significantly different ( $p > 0.05$ ). After 60 minutes there were approximately 2.5 times as many *S. Derby* cells associated with the monolayer and approximately 4 times as many cells internalised than *S. Mbandaka* cells. Control strain *E. coli* K12 was not recovered after gentamicin treatment indicating that this step was effective in killing the Gram negative bacteria on the surface of the monolayer.

Though other studies have found poor concordance between monolayer invasion rates, pathogenicity and host association, the use of monolayers here shows that *S. Derby* is more proficient at associating and invading IPEC-J2 monolayers than *S. Mbandaka* [15,16]. It was previously shown, with two strains of *S. Typhimurium*, that differences in invasion rates observed in IPEC-J2 assays were comparable to those found in porcine mucosal explants [17]. Though we may not assert that the more

proficient association and invasion by *S. Derby* is the determinant of the bias towards a porcine host, we can suggest that *S. Derby* possesses adaptations for aspects of pathogenesis of the porcine host, that are absent in the comparator serovar, *S. Mbandaka*. Of course, it would be interesting to undertake a broader study of populations of a variety of serovars, especially the promiscuous serotypes such as *S. Typhimurium*, to assess whether this finding holds true across different serovars.

The colon is also a site commonly associated with *Salmonella* invasion [18,19]. To assess if there was preferential attachment by *S. Derby* to either of these tissues, porcine IVOC association assays were performed. Both *S. Derby* strains associated in significantly greater numbers with jejunum when compared to colon ( $p < 0.05$ ) (data not shown). After 30 minutes there were 2.5 times as many *S. Derby* D1 cells associated with the jejunum than the colon. For strain *S. Derby* D2 there were 1.5 times as many cells associated to jejunum than colon tissues. This suggests that *S. Derby* preferentially attaches to the jejunum over the colon. No colonies were recovered from the PBS controls, suggesting that colonies observed in the IVOC association assays were not contaminants from residual gut microbiota.

### *Salmonella* pathogenicity island 23 (SPI-23) is up-regulated in the porcine jejunum IVOC preparations

In light of the preferential attachment of *S. Derby* to porcine jejunum compared to colon and the need to characterise the newly discovered SPI-23 in relation to pathogenesis in the porcine host, we investigated if there was a difference in transcriptional regulation of the island when the serovar was exposed to the different tissue types. Due to the greater fold difference between the number of *S. Derby* D1 cells associated with the jejunum and colon tissues compared to that of *S. Derby* D2, this strain was selected to study the potential differences in the expression of putative pathogenicity island, SPI-23, when exposed to jejunum and colon tissue explants.

The gene *potR* and the putative type three effector protein genes *genE*, *sadZ*, *tinY* and *docB* were up-regulated to a significantly greater degree ( $p < 0.05$ ) in jejunum when compared to colon, with fold changes from the no tissue control of between

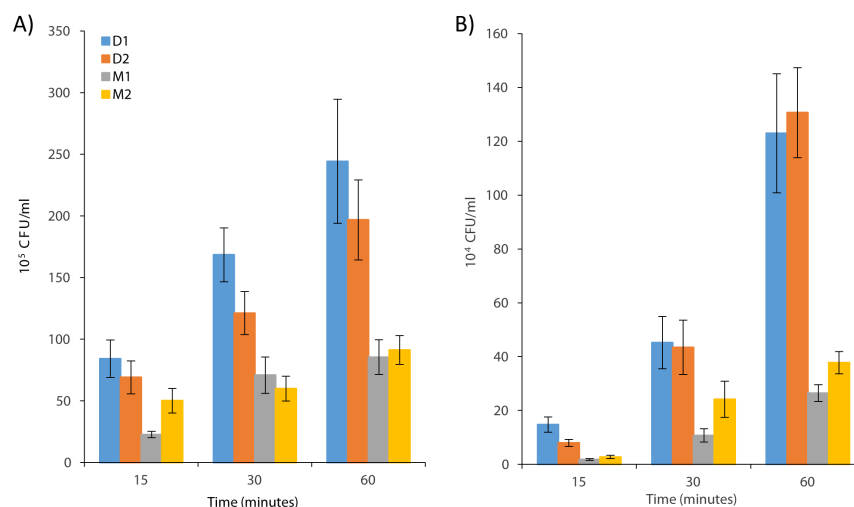

**Figure 1. Association and invasion of IPEC-J2 monolayers by *S. Derby* and *S. Mbandaka*.** (a) Association (cells adhering and invading) and (b) invasion of IPEC-J2, porcine jejunum derived cell line, by *S. Derby* strains D1 and D2 and *S. Mbandaka* strains M1 and M2 after 15, 30 and 60 minute incubation periods. Values are mean colony forming units (CFU)  $\pm$  1SEM recovered from disrupted monolayers planted on to LB agar plates and incubated for 16 hours at 37°C.

doi:10.1371/journal.pone.0107857.g001

21.6 and 74.4 (**Figure 2**). The putative type III effector protein, *sanA*, was the only gene expressed to a significantly greater degree in colon than in jejunum explants ( $p < 0.05$ ). The fold differences in expression levels from no tissue controls of the putative pilin protein gene *talN* and the putative type III effector protein genes *chlR*, *shaU* and *dumE* were not significantly different between the jejunum and colon explants ( $p > 0.05$ ). The largest significant fold change was observed for the gene *docB*, a putative type III effector protein, which was up-regulated 74.4 times more in the jejunum than in the colon. It was previously shown that 17 genes were unique to SPI-23 of *S. Derby*, whereas the gene *docB* was shown to be highly conserved in SPI-23 of *S. Agona*, *S. Dublin* and *S. Gallinarum* [8]; this raises the question about its expression and role in these host bacteria.

The *pilV*-like gene *potR*, previously shown to be unique in amino acid sequence to the SPI-23 of *S. Derby* D1 and D2, has the second largest difference between tissues, with a 13 fold greater expression level in the jejunum compared to colon [8]. The smallest significant difference between fold change from the no tissue control between the jejunum and colon treated cells was for the gene *sanA*, with a 3.5 fold greater level of transcription in colon samples than in jejunum. The up regulation of a subset of SPI-23 genes in the jejunum compared to both the colon and no tissue control suggests that the island may play a part in the preferential adherence and invasion in IVOC assays in jejunum rather than colon tissue.

### Sequence features of *potR* and the phenotype of *S. Derby* D1 $\Delta potR::kan$

Due to the novelty of the gene *potR* in the SPI-23 of *S. Derby*, the high degree of up-regulation of the gene during exposure to jejunal tissue explants and the preferential association of the isolate to jejunal tissue explants, we characterised the phenotype of this gene further.

As a preliminary step to determine the role of *potR* in *S. Derby* we identified the conserved protein domains. *potR* encodes 495 amino acid residues, sharing 89% with the putative *pilV*-like

partial protein ZP\_12137808 from the genome sequence of *Salmonella* Hvittingfoss strain A4-620. BLASTp showed the first 405 amino acids of *potR* consist of a multi-domain region containing a shufflon domain (5-405aa, e-value  $6.22e^{-17}$ ), a *pulG* pseudopilin motif domain (1-134aa, e-value  $9.65e^{-04}$ ), a *gspG* type II export sequence motif domain (5-56aa, e-value  $8.88e^{-03}$ ) and a type IV pilin methylation domain (1-26aa, e-value  $3.83e^{-03}$ ). These domains are consistent with other putative *pilV* genes, including *Salmonella* Hvittingfoss strain A4-620 and *Salmonella* Typhi strain CT18 (BLASTp performed 3/4/14). The region between amino acids 405 and 495 had no identifiable conserved domain. In *S. Typhi* the PilV protein is located to the tip of the self-aggregating pilus, attaching to a larger PilS protein, causing the pili to detach from the cell surface in a particular conformation of the shufflon, allowing cells to remain planktonic [20].

Allelic exchange mutagenesis with a Kanamycin cassette produced the strain *S. Derby* D1  $\Delta potR::kan$ , which displayed a strong agglutinating phenotype when left statically at room temperature (**Figure 3a**) suggesting that *potR* is isofunctional to *pilV* [20]. We were unable to remove the kanamycin cassette from *S. Derby* D1  $\Delta potR::kan$  and complement *potR* despite many attempts at electroporation this is presumably due to the strong agglutination of a static culture.

Negative stain microscopy of overnight planktonic cultures of *S. Derby* D1 and *S. Derby* D1  $\Delta potR::kan$  showed clearly that the mutant strain displayed a much higher number of pili on its cell surface when compared to the parent strain (**Figure 3b**). This suggests that either pili were upregulated or unable to dissociate from the cell surface. Colony morphology also distinguished the mutant from the parent strain. Plating planktonic cultures of parent and mutant strains onto LB agar plates resulted in the formation of fewer and larger colonies by the mutant strain (**Figure 3c**). Both parent and mutant colonies were of smooth morphology. Yet half of the diameter skirting the outer side of the mutant colonies was translucent, this was absent from the parent colonies which were opaque to the margins.

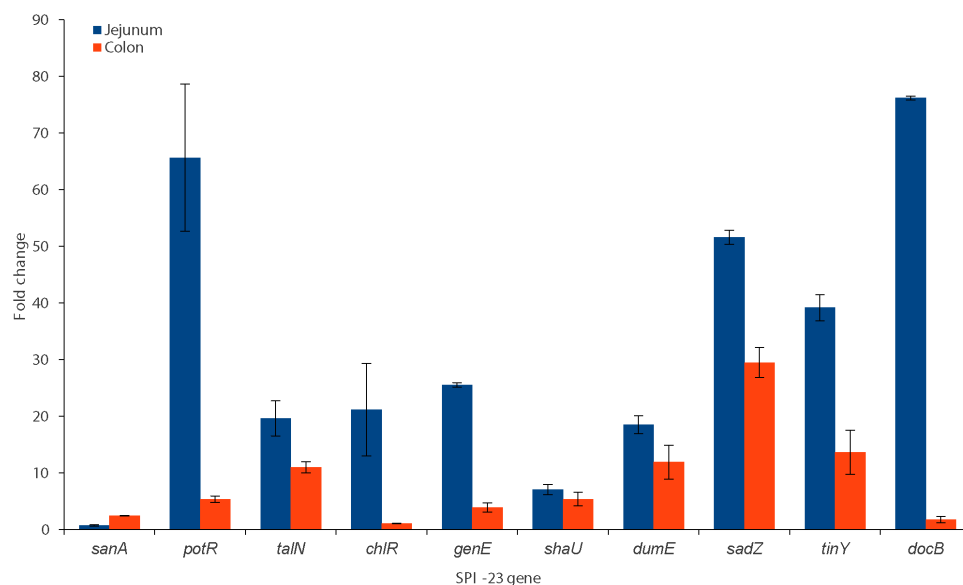

**Figure 2. Expression of SPI-23 in *S. Derby* D1 when exposed to jejunum and colon explants.** Fold differences in qRT-PCR expression levels  $\pm 1$  SEM of ten genes found on SPI-23, in the order they appear on the island, when exposed to porcine jejunum and colon explants relative to a no tissue control.

doi:10.1371/journal.pone.0107857.g002

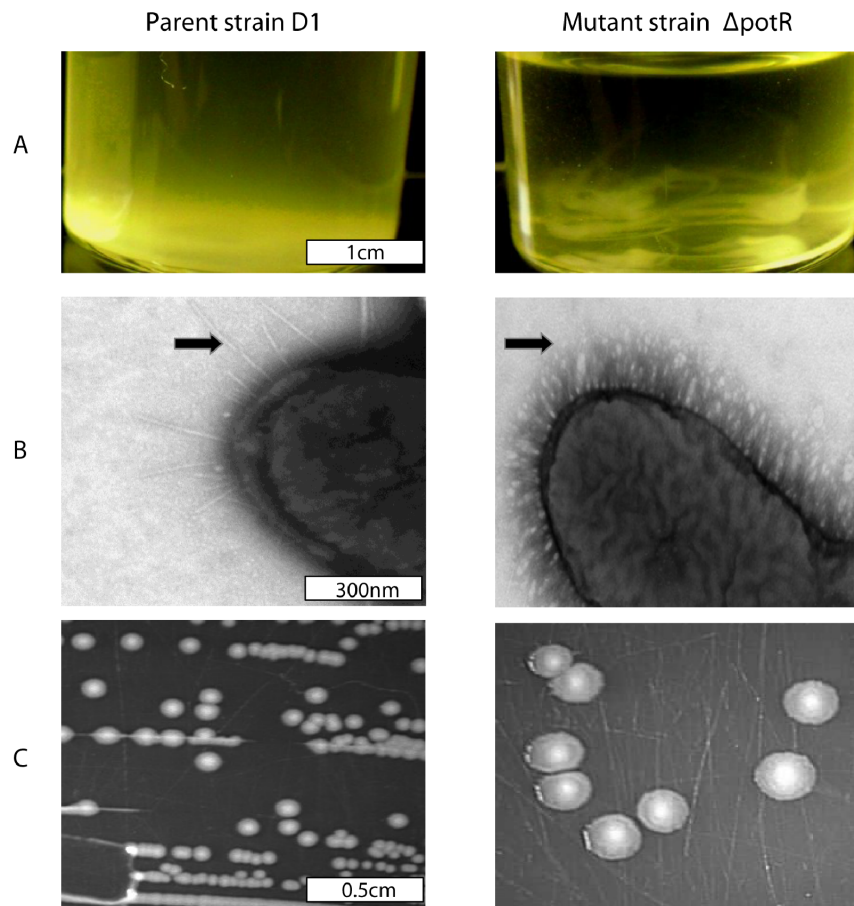

**Figure 3. Comparison of morphological and structural features of the *S. Derby D1* parental and *potR* mutant strains.** Comparison of *S. Derby D1* (left) and mutant strain *S. Derby D1  $\Delta potR::kan$*  (right). (a) Strains were photographed after 2 hours remaining static post 16 hours of culturing at 37°C with agitation at 220 rpm. (b) Negative electron microscopy performed after 16 hours of culturing at 37°C with agitation at 220 rpm. Pili on the mutant and type-1 fimbriae on the parental strain are marked by arrows. (c) Strains were plated on to LB agar plates and incubated for 16 hours at 37°C.  
doi:10.1371/journal.pone.0107857.g003

To evaluate the effect of the *ΔpotR* phenotype on the interaction between *S. Derby* and the porcine jejunum, confocal microscopy was performed on IPEC-J2 monolayers after 4 hours of exposure to planktonic mid-log cultures of *S. Derby D1* and *S. Derby D1  $\Delta potR::kan$* . Inspection of confocal preparations showed that the parent strain adhered in much greater numbers than the mutant (Figure 4). Hence, it may be inferred that the agglutinating phenotype hampered the ability of *Derby D1  $\Delta potR::kan$*  to adhere to and invade IPEC-J2 monolayers. It was suggested by Morris et al. (2003) that the aggregating phenotype seen with the down regulation of *pilV*, found on SPI-7 of *S. Typhi*, may increase the number of cells invading the small intestine in humans [21,22]. They proposed that internalisation of aggregated cell masses would increase the intracellular load of the pathogen compared to single cell invasion events, though they found no evidence of mutation in *pilV* affecting the number of cells invading INT407 human cells [21]. Here we show that the *pilV*-like gene, *potR* knock out produces a highly self-aggregating phenotype that leads to lower numbers of cells adhering and fewer cells invading the porcine jejunal monolayer. This would suggest the converse to the hypothesis put forward by Morris et al. (2003), namely that the bacteria are likely to be planktonic in the lumen of the porcine jejunum, where *S. Derby* preferentially associates and where *potR* is up-regulated, which potentially allows a greater degree of

adhesion and invasion, as cells can cover a larger surface area, through the formation of detachable, self-aggregating pili [21]. A similar hypothesis has been proposed for an aggregative strain of *S. Typhimurium* which is less pathogenic than a non-aggregating strain in a mouse model [22].

## Conclusions

We have shown (a) increased association to porcine jejunum derived monolayers of *S. Derby* (commonly isolated from pigs) compared to *S. Mbandaka* (rarely isolated from pigs) for which we previously performed in depth comparative functional genomics (b) the preferential association of *S. Derby* to porcine jejunum explants and (c) the greater up-regulation of SPI-23 genes in the jejunum compared to the colon explants that collectively may be taken as supportive evidence to indicate that SPI-23 contributes to tissue tropism. This hypothesis is further supported here by the characterisation of the gene *potR*. We have shown that a *S. Derby* knock-out mutant of the *pilV*-like gene *potR* is unable to adhere to or invade porcine jejunum derived monolayers. We speculate that this phenotype may be linked to the observed tissue tropism, as the high expression level of *potR* in the jejunum may allow the culture to remain planktonic and therefore invade a larger surface area compared to the colon where *potR* expression is lower.



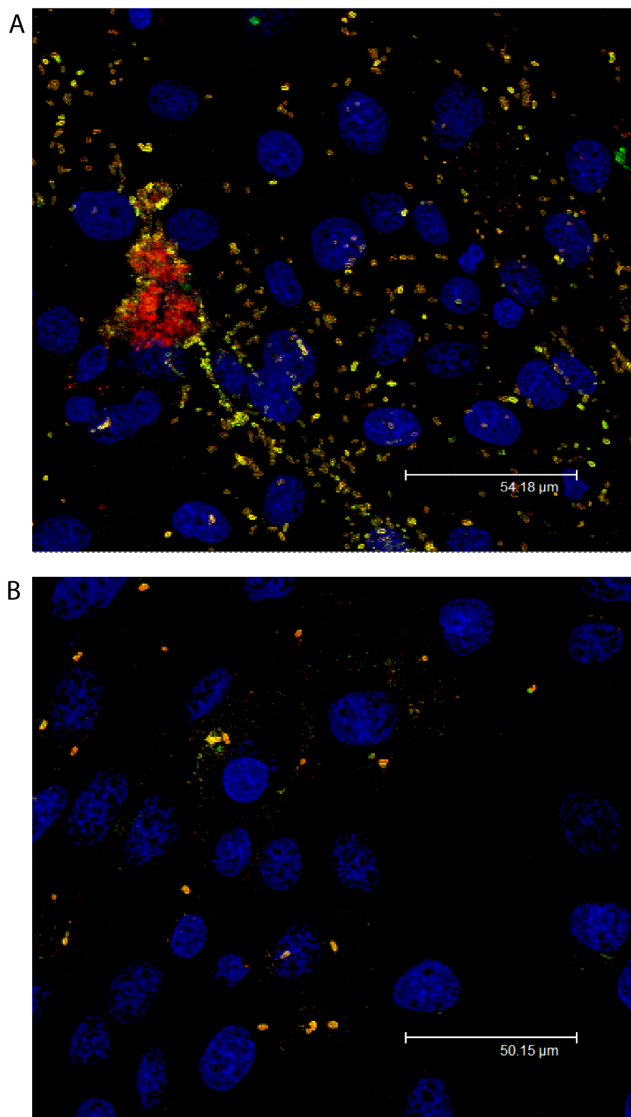

**Figure 4. Adhesion and Invasion of *S. Derby* D1 parent and *potR* mutant strains.** Differential stain confocal microscopy of (a) *S. Derby* D1 and (b) *S. Derby* D1  $\Delta potR::kan$  that have adhered (yellow) and invaded (red) IPEC-J2 monolayers (blue) after 4 hours exposure. doi:10.1371/journal.pone.0107857.g004

Further experiments are required to test these hypotheses namely inoculation studies in a porcine model.

## Methods and Materials

### Strains and culturing

The strains used in this study, *S. Derby* D1 and D2 and *S. Mbandaka* M1 and M2, were selected as their chromosome sequences have been previously annotated and compared [8]. The strains were isolated from different geographical locations during background monitoring performed on livestock in the UK between 2000 and 2010. *S. Derby* isolates D1 and D2 were obtained from pigs in 2008 and *S. Mbandaka* isolates M1 and M2 were obtained in 2008 and 2009 from cattle [8].

Unless stated otherwise, the strains were grown at 37°C for 16 hours aerobically either on LB agar plates or in LB broth agitated vigorously at 220 rpm. For porcine IVOC and IPEC-J2

assays mid-log cultures were used; this was achieved through inoculation of 20 ml of pre-warmed LB with 200  $\mu$ l of a 16 hour overnight culture, followed by incubation for 3 hours at 37°C with agitation at 220 rpm. A frozen stock cultures was made of the *potR* mutant, *S. Derby* D1  $\Delta potR::kan$  directly from a planktonic culture. Due to the strong agglutinating phenotype beads were made directly from fresh planktonic cultures grown for 16 hours in LB broth at 37°C with agitation at 220 rpm. From the culture, 100  $\mu$ l of planktonic culture was mixed in a 2 ml CryoVial (Fisher Scientific, USA) containing 1.5 ml of HIB (brain heart infusion broth) + 30% glycerol and quickly placed into a  $-80^{\circ}\text{C}$  freezer, to freeze the culture in its planktonic state.

### Culturing and infection of IPEC-J2 monolayers

Association and invasion assays using the porcine jejunum derived IPEC-J2 monolayers were performed in triplicate on three separate occasions, based on the method described by Searle *et al.* (2009) [23]. IPEC-J2 (passage 70–72) cells were seeded at  $1.6 \times 10^5$  cells/ml into 24 well plates and cultured using IPECs media consisting of: Dulbecco's Modified Eagle's Medium (DMEM; Sigma, UK) supplemented with 5% foetal bovine serum (Sigma, UK), 1% 2 mM l-glutamine (Sigma, UK), 1% sodium pyruvate (Sigma, UK) and 1% ITSS (Sigma, UK). Following 48 hours incubation at 37°C (100% confluence) the monolayers were washed three times with Hank's balanced salt solution (Sigma, UK). Each washed monolayer was inoculated separately with 1 ml of *S. Derby* D1 and D2, *S. Mbandaka* M1 and M2, *Escherichia coli* K12 DH5 $\alpha$  (non-invading control) and a blank PBS control. This was performed in triplicate for each strain. For these studies, inocula were cultured to mid-log phase, standardised to an  $\text{OD}_{540\text{nm}}$  of 1.2 in PBS, and further diluted 1:20 in IPECs medium. Inoculated monolayers were incubated statically, at 37°C in 5%  $\text{CO}_2$ . The assay was performed for three different incubation periods, 15, 30 and 60 minutes to identify variation in association and invasion rate between *S. Derby* D1 and D2 and *S. Mbandaka* M1 and M2. After incubation, monolayers were washed a further three times with Hank's balance salt solution. To the plates designated for studying invasion, 1 ml of IPECs medium containing 1% gentamicin (Sigma, UK) was added to each well, to kill external, but not internal, bacteria. Invasion plates were incubated for a further two hours at 37°C in 5%  $\text{CO}_2$ . After incubation the monolayers were washed a further three times with Hank's balance salt solution (Sigma, UK).

Monolayers of both preparations were disrupted with individual, sterile, magnetic stirrers in parallel for 10 minutes in 1 ml of 1% TritonX (Sigma, UK) diluted in PBS. Serial dilutions between  $10^0$ – $10^{-8}$  for each preparation including the initial standardized cultures were made in PBS, plated on to LB agar and incubated at 37°C for 16 hours. Colony forming units per ml were determined. T-tests were performed between the number of colony forming units per ml (CFU/ml) enumerated for all strains at each time point.

### Porcine *in vitro* organ culture and tissue association assay

*In vitro* organ culture (IVOC) was performed as previously described by Collins *et al.* [12]. On two separate occasions, three, six-week old, cross bred commercial pigs were stunned and euthanized through exsanguination. Jejunum and colon tissues were immediately removed from each pig and stored in separate Duran (Duran group, Germany) bottles containing 300 ml of pre-chilled IVOC medium which comprised RPMI 1640 medium (Sigma, UK) containing 10% foetal bovine serum (Sigma, UK), 0.25% lactalbumin hydrosylate (Sigma, UK), 75 mM mercaptoethanol (Sigma, UK), 0.2  $\mu\text{g ml}^{-1}$  hydrocortisone (Sigma, UK)

(1:1 chloroform/ethanol), 0.1  $\mu\text{g ml}^{-1}$  ITSS (Sigma, UK), and 2 mM L-glutamine and L-aspartate (Sigma, UK). Jejunum and colon tissues were opened through a single transverse incision, followed by washing through submersion in PBS. The clean tissues were maintained in IVOC medium. Tissues were cut with a scalpel into 2  $\text{cm}^2$  squares; sections were stored in IVOC medium until all tissues had been processed. Sections were mounted on CellCrowns (Scaffdex, Finland) with the mucosal side facing inwards, so as to form the base of the compartment. Crowns were placed into 24 well plates containing 1 ml of IVOC medium.

Association assays were performed on the mounted jejunum and colon tissues on two separate occasions. Mid-log cultures of *S. Derby* D1 and D2 were standardised in PBS to an  $\text{OD}_{540\text{nm}}$  of 1.2, PBS controls were also produced to determine bacterial contamination from the gut microflora, from these preparations a 1:20 dilution was made in IVOC medium pre-warmed to 37°C. Mounted tissues were inoculated in quadruplicate for RNA expression and association assays with 1 ml of each inoculum. A no tissue control (just bacteria) was also included for the RNA samples. Plates were subsequently incubated for 30 minutes at 37°C with 5%  $\text{CO}_2$ . After incubation tissues were washed in 2 ml of sterile PBS; samples for RNA were added to 1 ml Tri-reagent (Sigma, UK), samples for enumeration were added to 10 ml of PBS.

Samples for enumeration were homogenised using a D-7801 hand held homogenizer equipped with emulsifier blades (Ystral, Germany). Homogenates were diluted in PBS in a series between  $10^{-1}$  to  $10^{-4}$  and were plated onto BGA (Oxoid, UK) supplemented with 1  $\mu\text{g/ml}$  novobiocin (Sigma, UK) to enrich for *S. enterica* [24]. Plates were incubated for 16 hours at 37°C, prior to enumeration. T-tests were performed between the number of colony forming units per ml (CFU/ml) enumerated for all combinations of strains and tissues.

### RNA extraction and quantitative RT-PCR (qRT-PCR)

Colon and jejunum IVOC sections infected with *S. Derby* D1 and blank controls, as well as no tissue controls were stored in Tri-reagent at  $-80^\circ\text{C}$  until RNA purification was performed. Samples were thawed on ice and homogenised using a Retsch MM301 bead homogeniser with 2.5 mm steel beads for 2 minutes at  $30\text{S}^{-1}$  (Retsch, Germany). RNA was extracted using the Tri-reagent (Invitrogen, UK) chloroform method as per manufacturer's instructions. The final pellets were re-suspended in nuclease free water. Genomic DNA was removed using two treatments with DNA free (Ambion, UK) as per manufacturer's instructions and confirmed by the absence of a band after gel electrophoresis of a PCR reaction for the housekeeping gene *aroC* (primer sequences can be found in the **Table S1**). qRT-PCR reactions were performed using one-step Brilliant II SYBR Green with low ROX master mix (Stratagene, UK) as per manufacturer's instructions. In brief, 25  $\mu\text{l}$  reactions were performed consisting of, 12.5  $\mu\text{l}$  of Brilliant II SYBR green with low ROX master mix, 8.5  $\mu\text{l}$  of nuclease free water, 1  $\mu\text{l}$  of reverse transcriptase/RNase block enzyme, 1  $\mu\text{l}$  of RNA (200 ng), and 1  $\mu\text{l}$  (200 nM) of forward and reverse primers specific to the genes *gmk*, *sanaA*, *potR*, *talN*, *chlR*, *genE*, *shaU*, *dumE*, *sadZ*, *tinY* and *docB* (primer sequences can be found in **Table S1**). For all primer sets and treatments, control reactions were performed, comprising either whole cell DNA extract of *S. Derby* D1, RNA with no reverse transcriptase or reverse transcriptase with no nucleotide template. Reactions were performed on a Stratagene Mx3000P, the parameters of the reaction were in accordance with the 2-step reaction recommended by Stratagene for the one-step Brilliant II SYBR Green with low ROX master mix with an annealing temperature of

52°C. The threshold cycle (CT) was calculated for each reaction by the Stratagene Mx3000P software V2.0 (Stratagene, UK) and standardised to the reading for the constitutively expressed guanylate kinase gene, *gmk*, as previously described [25,26]. The efficiency of each PCR reaction was determined using dilutions of DNA template in nuclease free water to 1:10, 1:100, 1:1000; this was then used to adjust the relative concentration of each transcript. Results are given as fold changes relative to the readings for the no tissue control. T-tests were performed on the fold change values between jejunum and colon, p-values below 0.05 were deemed to be significant.

### Mutant construction and validation

The gene *potR* was deleted from the chromosome of *S. Derby* D1 using the Quick & Easy *E. coli* Gene Deletion Kit (GeneBridges, Germany), as per manufacturer's instructions. In brief, a 10 ml overnight culture of *S. Derby* D1 was made electrocompetent through five successive rounds of centrifugation at 4000 rpm for 10 minutes at 4°C followed by re-suspension in ice cold distilled water and incubation on ice for 20 minutes. A final round of centrifugation was performed, this time the pellet was re-suspended in 200  $\mu\text{l}$  of distilled water containing 10% glycerol. Cells were stored on ice until used.

To delete the gene *potR* from SPI-23, a kanamycin resistance cassette under a pGB2 promoter (GeneBridges, Germany) was produced so that it was flanked by 50 bp of sequence homologous to the regions either side of the gene, as per manufacturer's instructions. In brief, the site specific homology arms were introduced into the cassette by designing 20 bp primers (Sigma, UK) for the 5' and 3' ends of a FRT-pPGK-pGB2-neo-FRT cassette (GeneBridges, Germany) with an additional region of 50 bp that was homologous to either the 5' or 3' sequence adjacent to *potR* (primer sequences can be found in **Table S1**). PCR products were purified through gel electrophoresis, staining with ethidium bromide and were excised from the gel and purified using a QIAquick gel extraction kit (Qiagen, USA) as per manufacturer's instructions. The concentration of the purified cassette was determined using a Nanodrop N1000, spectrophotometer (Nanodrop, USA).

Electroporation was performed twice, once to introduce a plasmid carrying Red/ET recombinase under a temperature dependent promoter (GeneBridges, Germany), and secondly to introduce the cassette with homology arms for site specific recombination with *potR*. In both cases, 2  $\mu\text{l}$  of nuclease free water containing approximately 200 ng of DNA (either cassette or plasmid) was added to 40  $\mu\text{l}$  of electrocompetent cells in a chilled 1 mm gap electroporation cuvette. Electroporation was performed with the following parameters: charging voltage 1.8 kV, resistance 600 ohms, pulse time of 4.2  $\mu\text{s}$  and capacitance timing 25  $\mu\text{F}$ . Selection of, and recombination in, transformed strains was performed as per manufacturer's instructions (GeneBridges, Germany). The correct insertion of the kanamycin cassette and deletion of *potR* was confirmed through colony PCR of the cassette chromosome margins and the central 1 kb of the gene (primer sequences can be found in **Table S1**). The mutant strain is from here on referred to as *S. Derby* D1  $\Delta\text{potR}::\text{kan}$ .

### Negative staining of *S. Derby* D1 parent and $\Delta\text{potR}::\text{kan}$ mutant

Negative staining was performed as follows, a 50  $\mu\text{l}$  of planktonic bacterial suspension was air dried onto a glow discharged formvar/carbon coated support grid. Grids were then negatively stained with 2% phosphotungstic acid (pH 6.6) and

immediately examined under a FEI Tecnai 12BT transmission electron microscope (FEI, USA) at 80 kV.

### Differential staining and confocal microscopy of invaded and associated bacteria to IPEC-J2 monolayers

IPEC-J2 monolayers were cultured on cover slips. The monolayers were exposed to *S. Derby* D1 and *S. Derby* D1 *ApotR::kan* as described above for the association assay. The monolayers were incubated with the inoculum for 4 hours to allow for a large number of bacteria to adhere and invade. After the incubation step, the inoculum was removed and the infected cells were fixed with 4% paraformaldehyde for 16 hours at 4°C, instead of being homogenised with 1% TritonX as in the above described association assays. Cover slips were removed from fixative and washed three times in PBS before being blotted with tissue paper and placed monolayer side up in a fresh 12 well plate. Goat anti-*Salmonella* O4 antibodies were added to the centre of each cover slip and incubated at room temperature under tin foil for 45 minutes, at which point the cover slips were removed from the well, washed three times in PBS and added to a fresh 12 well plate. This was repeated three times with the antibodies, donkey anti-goat labelled with Alexa 488 (Invitrogen, UK), goat anti-*Salmonella* O4, and donkey anti-goat labelled with Alexa 555 (Invitrogen, UK). Between the applications of antibodies Alexa 488 and the second application of goat anti-*Salmonella* O4, the IPEC-J2 cells were made permeable to antibodies through 10 minutes incubation with 0.3% TritonX diluted in PBS. After the final antibody was washed off the coverslips were dried with tissue paper and placed monolayer side down on to 5 µl drops of DAPI (Vector Laboratories, UK) on glass slides. The slides were incubated at room temperature under tin foil for 10 minutes, after which a thin layer of nail varnish was painted around the edge of the cover slips. Slides were viewed on a Leica TCS SP2 AOBS confocal system (Leica, Germany) attached to a Leica DM IRE2 microscope (Leica, Germany) equipped with ArKr laser excitation (488 nm), HeNe laser excitation (543 nm) and a diode laser (405 nm). Oil-immersion objective lenses (40× and 63×) were used, and imaging parameters were selected to optimise resolution.

### References

1. Suar M, Jantsch J, Hapfelmeier S, Kremer M, Stallmach T, et al. (2006) Virulence of Broad- and Narrow-Host-Range *Salmonella enterica* Serovars in the Streptomycin-Pretreated Mouse Model. *Infect. Immun.* 74: 632–644.
2. Suar M, Jantsch J, Hapfelmeier S (2006) Virulence of broad-and narrow-host-range *Salmonella enterica* serovars in the streptomycin-pretreated mouse model. *Infect. Immun.* 74: 632–644.
3. Baumlér AJ, Tsolis RMRM, Ficht TA, Adams LG, Tsolis EM, et al. (1998) Evolution of Host Adaptation in *Salmonella enterica*. *Infect. Immun.* 66: 4579–4587.
4. Kingsley R, Bäumlér J (2000) Host adaptation and the emergence of infectious disease: the *Salmonella* paradigm. *J. Mol Biol.* 36: 1006–1014.
5. AHVLA DEFRA (2011) *Salmonella* in livestock production, annual report. Weybridge, UK.
6. CDC PHLIS (2010) *Salmonella* annual survey 2009. Volume 2010. Atlanta, USA.
7. CDC (2011) National Enteric Disease Surveillance: *Salmonella* Surveillance Overview. Atlanta USA.
8. Hayward MR, Jansen VA, Woodward MJ (2013) Comparative genomics of *Salmonella enterica* serovars Derby and Mbandaka, two prevalent serovars associated with different livestock species in the UK. *BMC Genomics* 14:365.
9. Samudrala R, Heffron F, McDermott JE (2009) Accurate prediction of secreted substrates and identification of a conserved putative secretion signal for type III secretion systems. *PLoS pathog.* 5:e1000375.
10. Hapfelmeier S, Ehrbar K, Barthel M, Kremer M, Hardt W (2004) Role of the *Salmonella* Pathogenicity Island 1 Effector Proteins SipA, SopB, SopE, and

### Characterising colony morphology and culture agglutination

*S. Derby* D1 parent and D1 *ApotR::kan* mutant were cultured from a frozen stock in 2 ml of pre-warmed LB at 37°C with agitation. From these cultures 100 µl was plated onto dried LB plates and incubated for 16 hours at 37°C. The remainder of the culture was left at room temperature for 2 hours before the cultures were gently agitated by hand and photographed.

### Bioinformatics

The conserved domains and homologous sequences of the amino acid sequence of *potR* were identified using BLASTp against a non-redundant protein database (using default settings, Accessed 5/12/13).

### Ethics statement

All studies involving the use of animals were reviewed and approved by the Animal Health and Veterinary Laboratories Agency (AHVLA) ethics committee. None of the research presented in this manuscripts was performed on live animals. For the IVOC experiments, six, six-week old, cross bred commercial pigs were electrically stunned and euthanized through exsanguination, a schedule 1 approved method, prior to post-mortem examination and tissue collection.

### Supporting Information

**Table S1 Primer sequences.** Sequences used in, the creation of the *potR* mutant, qRT-PCR for SPI-23 expression profiling and to test for DNA contamination of DNase treated RNA samples. (XLS)

### Acknowledgments

With special thanks to Luke Mappley for his help during the IVOC experiments. I would also like to thank colleagues in BAC2 in the Department of Bacteriology and Food Safety at AHVLA (Weybridge).

### Author Contributions

Conceived and designed the experiments: MJW VAAJ MRH MA RMLR MAT LP. Performed the experiments: WAC DE MRH MAT. Analyzed the data: MRH. Wrote the paper: MRH VAAJ MJW.

- SopE2 in *Salmonella enterica* Subspecies 1 Serovar Typhimurium Colitis in Streptomycin-Pretreated Mice. *Infect. Immun.* 72:795–809.
11. Waterman SR, Holden DW (2003) Functions and effectors of the *Salmonella* pathogenicity island 2 type III secretion system. *Cell. Microbiol.* 5:501–511.
12. Collins JW, Coldham NG, Salguero FJ, Cooley WA, Newell WR, et al. (2010) Response of porcine intestinal in vitro organ culture tissues following exposure to *Lactobacillus plantarum* JC1 and *Salmonella enterica* serovar Typhimurium SL1344. *Appl. Environ. Microbiol.* 76:6645–57.
13. Schierack P, Nordhoff M, Pollmann M, Weyrauch KD, Amasheh S, et al. (2006) Characterization of a porcine intestinal epithelial cell line for in vitro studies of microbial pathogenesis in swine. *Histochem. Cell. Biol.* 125:293–305.
14. Green BT, Brown DR (2006) Differential effects of clathrin and actin inhibitors on internalization of *Escherichia coli* and *Salmonella* Choleraesuis in porcine jejunal Peyer's patches. *Vet. Microbiol.* 113:117–22.
15. Paulin SM, Watson PR, Jones PW, Wallis TS (2000) Interaction of *Salmonella* serotypes with porcine macrophages *in vitro* does not correlate with virulence. *Microbiol.* 146: 1639–1649.
16. Paulin SM, Watson PR, Benmore AR, Stevens MP, Jones PW, et al. (2002) Analysis of *Salmonella enterica* serotype-host specificity in calves: avirulence of *S. enterica* serotype gallinarum correlates with bacterial dissemination from mesenteric lymph nodes and persistence *in vivo*. *Infect. Immun.* 70: 6788–6797.
17. Schmidt LD, Kohrt LJ, Brown DR (2008) Comparison of growth phase on *Salmonella enterica* serovar Typhimurium invasion in an epithelial cell line (IPEC J2) and mucosal explants from porcine small intestine. *Comp. Immunol. Microbiol. Infect. Dis.* 31:63–69.

18. Wood RL, Pospischil A, Rose R (1989) Distribution of persistent *Salmonella* typhimurium infection in internal organs of swine. *Am. J. Vet. Res.* 50:1015–21.
19. Santos RL, Raffatellu M, Bevins CL, Adams LG, Tükel C, et al. (2009) Life in the inflamed intestine, *Salmonella* style. *Trends. Microbiol.* 17:498–506.
20. Tam CKP, Morris C, Hackett J (2006) The *Salmonella enterica* serovar Typhi type IVB self-association pili are detached from the bacterial cell by the PilV minor pilus proteins. *Infect. Immun.* 74:5414–8.
21. Morris C, Yip CMC, Tsui ISMI, Wong DK, Hackett J, et al. (2003) The Shufflon of *Salmonella enterica* Serovar Typhi Regulates Type IVB Pilus-Mediated Bacterial Self-Association. *Infect. Immun.* 71:1141–1146.
22. Seth-Smith HMB (2008) SPI-7: *Salmonella*'s Vi-Encoding Pathogenicity Island. *J. Infect. Dev. Ctries.* 2:267–271.
23. White AP, Gibson DL, Grassl GA, Kay WW, Finlay BB, et al. (2008) Aggregation via the red, dry, and rough morphotype is not a virulence adaptation in *Salmonella enterica* serovar Typhimurium. *Infect. Immun.* 76:1048–58.
24. Scarle LEJ, Best A, Nunez A, Salguero FJ, Johnson L, et al. (2009) A mixture containing galactooligosaccharide, produced by the enzymic activity of *Bifidobacterium bifidum*, reduces *Salmonella enterica* serovar Typhimurium infection in mice. *J. Med. Microbiol.* 58:37–48.
25. Hoben DA, Ashton DH, Peterson AC (1973) Some observations on the incorporation of novobiocin into Hektoen enteric agar for improved *Salmonella* isolation. *Appl. Microbiol.* 26:126–7.
26. López-Garrido J, Casadesús J (2010) Regulation of *Salmonella enterica* pathogenicity island 1 by DNA adenine methylation. *Genetics* 184:637–49.
