# Supplementary material for: SPI-23 of S. Derby: Role in Adherence and Invasion of Porcine Tissues
Source: PLoS One. 2014 Sep 19;9(9):e107857. doi: 10.1371/journal.pone.0107857 (PMC4169617; doi:10.1371/journal.pone.0107857)
Supplement: Table S1 — Primer sequences. Sequences used in, the creation of the potR mutant, qRTPCR for SPI-23 expression profiling and to test for DNA contamination of DNAse treated RNA samples. (XLS) [file pone.0107857.s001.xls]

## Sheet: Sheet1
Mutant construction
Primer	Function	Sequence
potR_F_Adaptor	Forward adapter	gttaggaacgttatagggtcactttcctatattgtaatatcaaacataaaAATTAACCCTCACTAAAGGGCG
potR_R_Adaptor	Reverse adaptor	aagagggcgcttgcccttttctggtgattttttaaatgggagagataattTAATACGACTCACTATAGGGCTC
potR_com_F	Forward conformation	cagtgatcgttttaccacca
potR_com_R	Reverse conformation	tttaatgaagagggcgcttg
qRTPCR
Gene	Putative function	Forward primer	Reverse primer
sanA	Effector	ctgaaaatgtggcttccact	attttgccactggtctggt
potR	PilV-like	gggagccttattgcttttatg	cctcaccaagctgtttcatt
talN	Pilin	caagaaaggtttctcactactcg	gctctttgtgaagcctgaac
chlE	Effector	aaccacaaacaaccgaacag	ccttattaaagagccgcaca
genE	Effector	ttttcactgttttccatcaca	atcgattttcatcgcattgt
shaU	Effector	tgcagaaaatatccctagcc	gataggtatggcctccgatt
dumE	Effector	atgcgtattcgtccttcatc	cggagtagcccagtatgactt
sadZ	Effector	ccgcaaacaaaatcagaatta	ggccttccattgatttttct
tinY	Effector	aatcttttatgttgtgtccttgc	aactcatggtccattacatgc
docB	Effector	ggtacaggaaaaccgtcaga	tttcttctttcggtggagtg
gmk	Internal control	ttggcagggaggcgttt	gcgcgaagtgccgtagtaat
Control for genomic contamination of RNA
Gene	Forward primer	Reverse primer
aroC	cctggcacctcgcgctatac	ccacacacggatcgtggcg
